# Supplementary material for: Resolving phytosterols in microalgae using offline two-dimensional reversed phase liquid chromatography-supercritical fluid chromatography coupled with quadrupole time-of-flight mass spectrometry
Source: Royal Society of Chemistry journal article supplement (doi:10.1039/d3ay02261g), 2024-01-01
Supplement: d3ay02261g1.pdf [file d3ay02261g1.pdf]

## Supplementary Information

### Resolving phytosterols in microalgae using offline two-dimensional reversed phase liquid chromatography × supercritical fluid chromatography coupled to quadrupole time-of-flight mass spectrometry

Magali Batteau<sup>1</sup>, Elodie Bouju<sup>2</sup>, Adriana Ramirez-Romero<sup>3</sup>, René De Vaumas<sup>2</sup>, Sylvie Nuccio<sup>2</sup>, Florian Delrue<sup>3</sup>, Karine Faure<sup>1\*</sup>

#### List of figures in this Supplementary Information

**Fig. S1** LC chromatograms of standards using two different columns.

**Fig. S2** Influence of temperature

**Fig. S3** SFC chromatograms of standards using four different columns

**Fig. S4** Impact of gradient steepness on the resolution of critical pairs

**Fig. S5** Impact of injection diluent on peak width of cholesterol standard

**Fig. S6** Impact of injection volume on residual peak capacity of three selected peaks in *Scenedesmus obliquus*

**Fig. S7** 2D chromatograms of sterol standards mixture

**Fig. S8** MS1 and MS2 spectra of sterol standards

**Fig. S9** Extracted ion chromatogram for m/z 381.3516 in *Scenedesmus obliquus* extract and possible structures in  $\Delta 5$  and  $\Delta 7$ , proposed by MS Finder and sharing the same side chain.

**Fig. S10** Extracted ion chromatogram for m/z 367.3367 in *Padina pavonica* extract

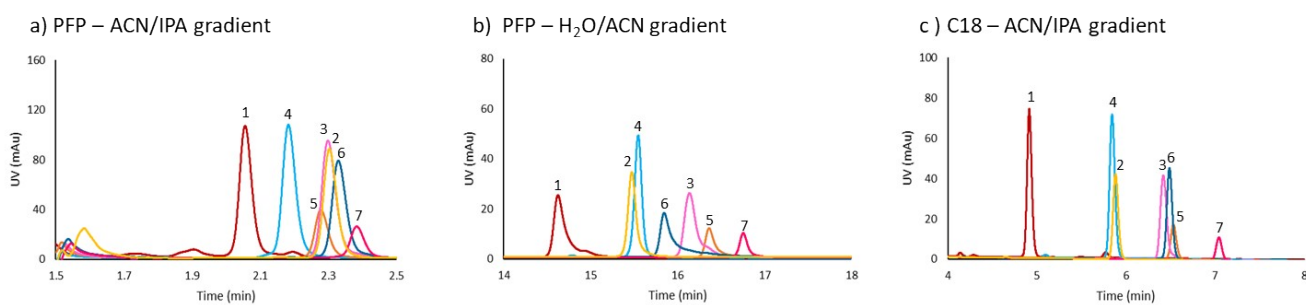

**Fig. S1** LC chromatograms of standards using two different columns. a-b) Kinetex F5 PFP and a) ACN/IPA mobile phase with a 0% to 20% IPA gradient and b) ACN/water mobile phase with a 50% to 100% ACN gradient and c) Luna Omega C18 and ACN/IPA mobile phase with a 0% to 50% IPA gradient. Gradient steepness 3%. Individual injection 1% column volume, 1.1 mL/min for a-b and 2.2 mL/min for c. Detection 210 nm

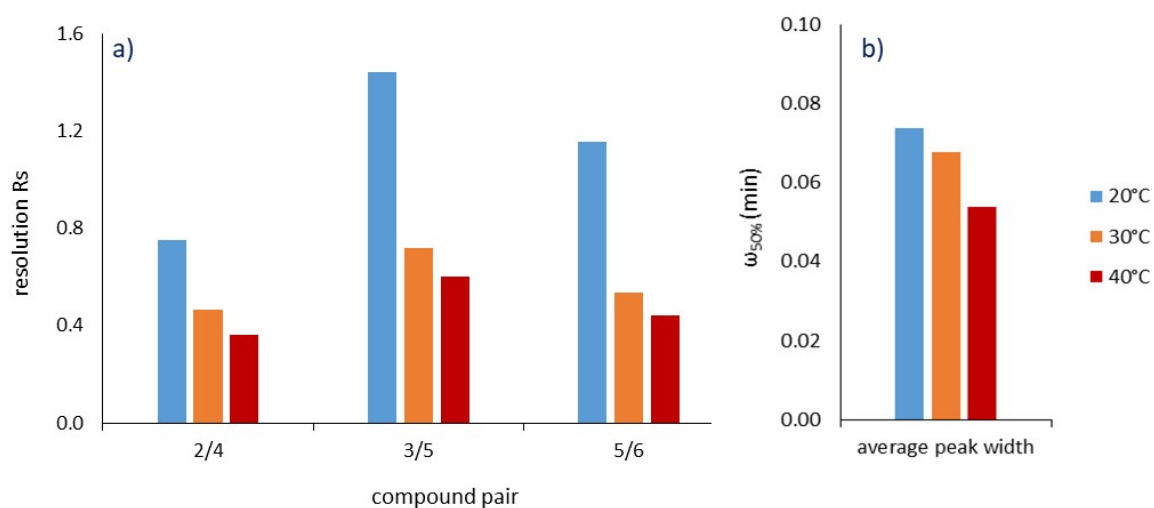

**Fig. S2** Influence of temperature on a) the resolution of critical pairs and b) the average peak width in LC analysis. Blue : 20°C, orange : 30°C and red : 40°C

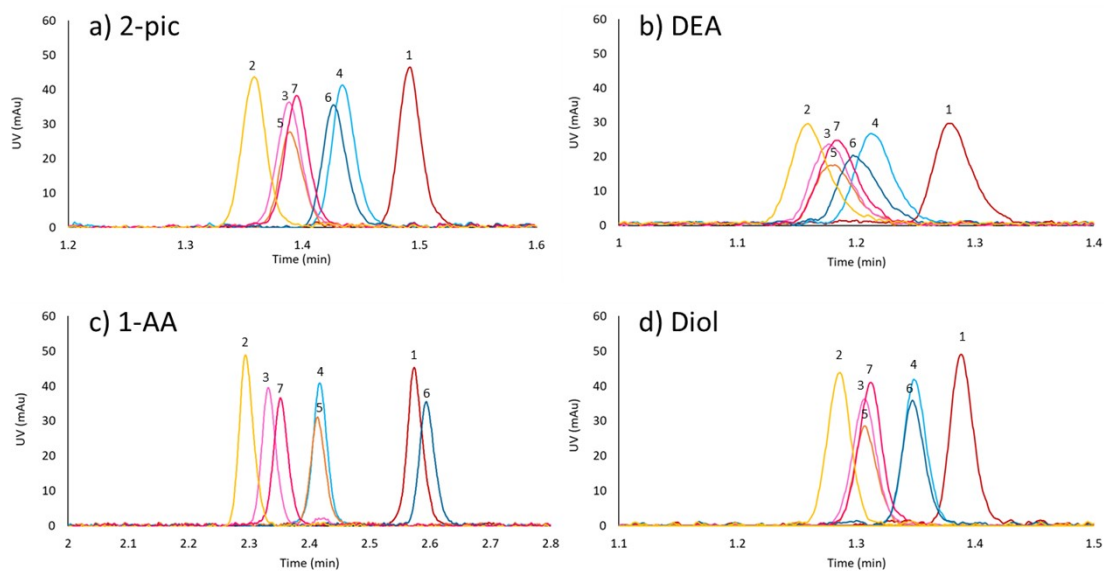

**Fig. S3** SFC chromatograms of standards using four different columns at  $F=1.2\text{mL}/\text{min}$  corresponding to  $F_{\text{max}}$ . Co-solvent MeOH gradient 5% - 40 %. Gradient steepness 2.5 %. Individual injections 1% column volume, detection 210 nm. Solute codes as in Table 2

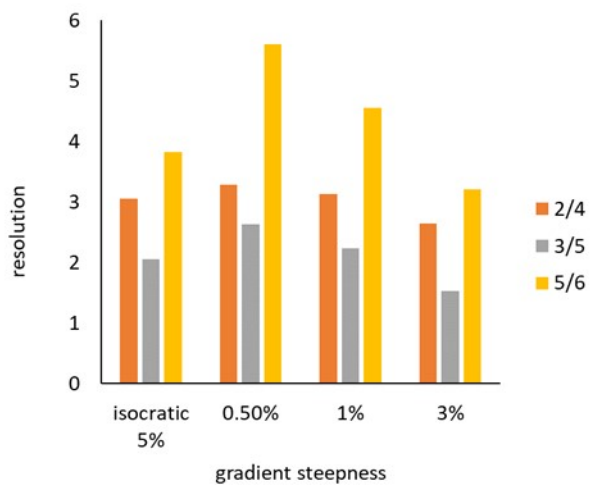

**Fig. S4** Impact of gradient steepness on the resolution of critical pairs. Other SFC conditions as in Table 2

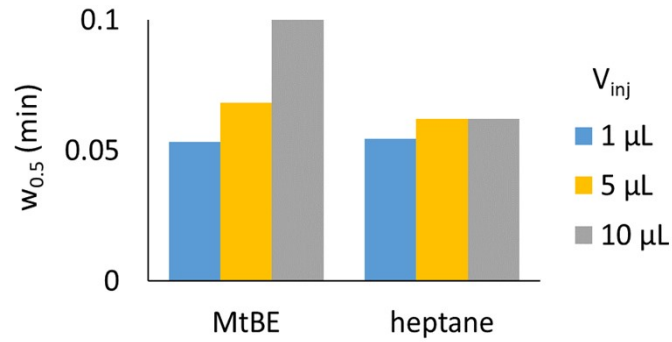

**Fig. S5** Impact of injection diluent on peak width of cholesterol standard. SFC conditions as in Table 2

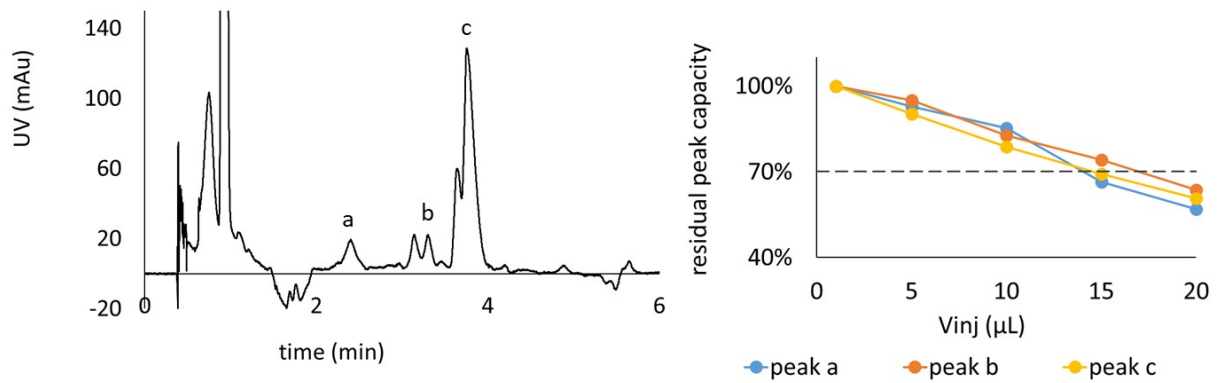

**Fig. S6** Impact of injection volume on residual peak capacity of three selected peaks in *Scenedesmus obliquus*. SFC conditions as in Table 1. The peak capacity was evaluated from peak width at half-height of three different peaks noted peak a, peak b and peak c.

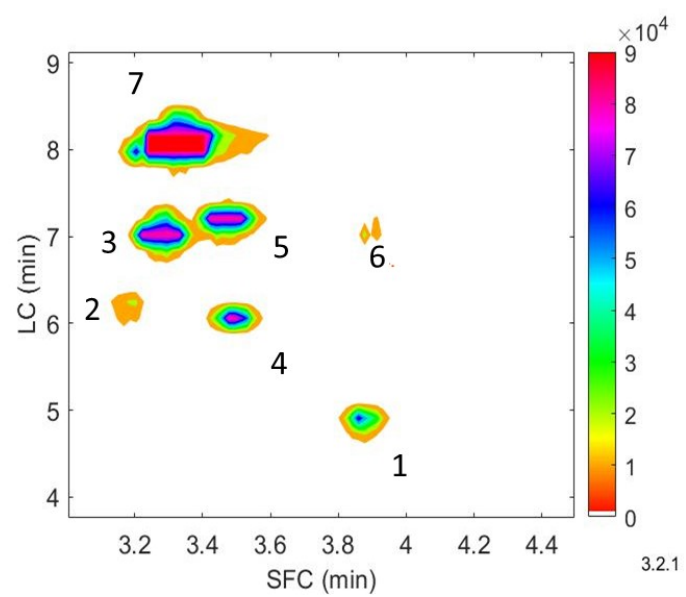

**Fig. S7** 2D chromatograms of sterol standards mixture. Compounds listed in Table 2. Sum of EIC from ions  $[M+H - H_2O]^+$

### Cholesterol

➤ EIC 369.3516

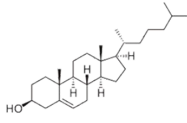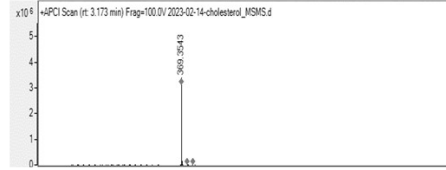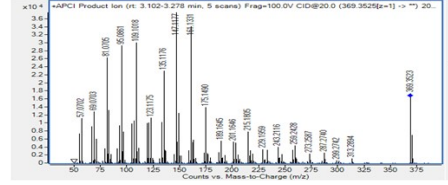

### Ergosterol

➤ EIC 379.3359

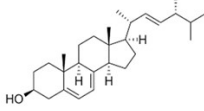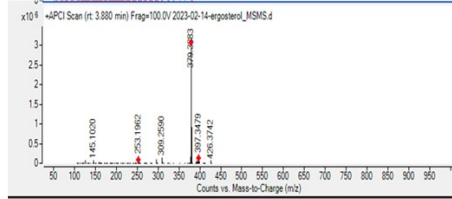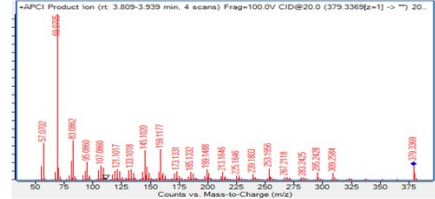

### Campesterol

➤ EIC 383.3672

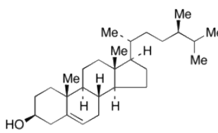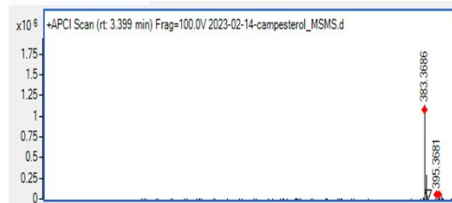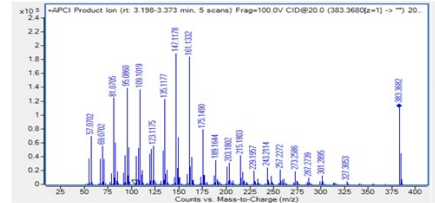

### Fucoesterol

➤ EIC 395.3672

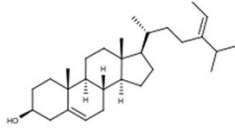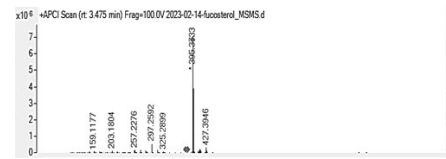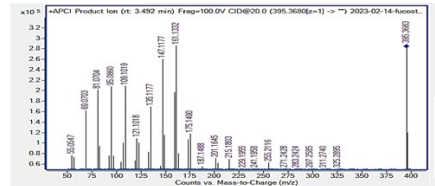

### Spinasterol

➤ EIC 395.3672

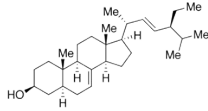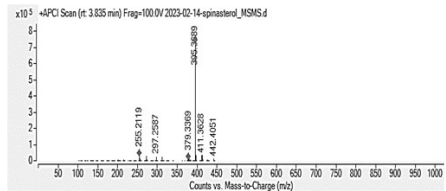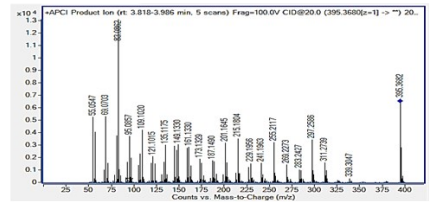

### Stigmasterol

➤ EIC 395.3672

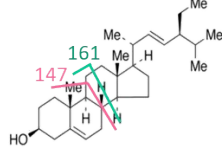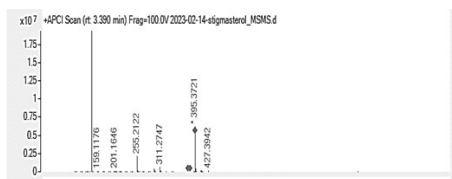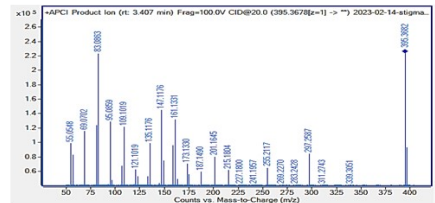

### Sitosterol

➤ EIC 397.3829

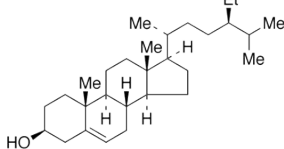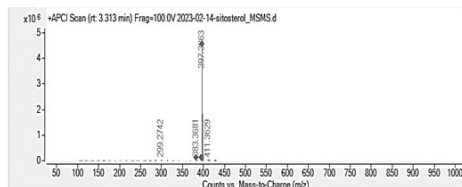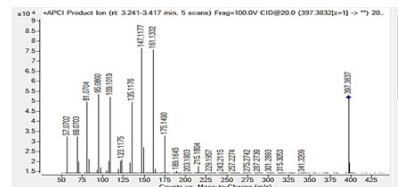

Fig. S8 MS1 and MS2 spectra of sterol standards. SFC-MS conditions in experimental section

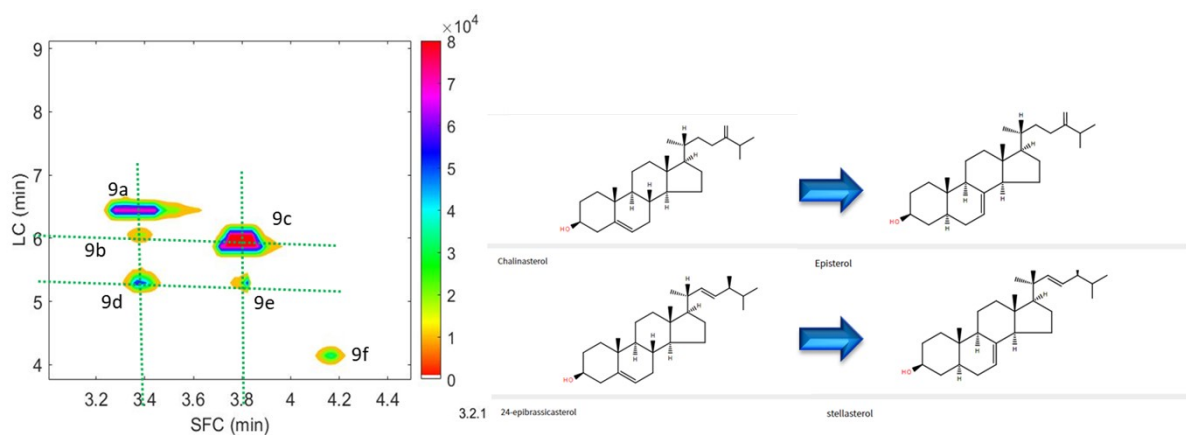

**Fig. S9** Extracted ion chromatogram for  $m/z$  381.3516 in *Scenedesmus obliquus* extract and possible structures in  $\Delta^5$  and  $\Delta^7$ , proposed by MS Finder and sharing the same side chain.

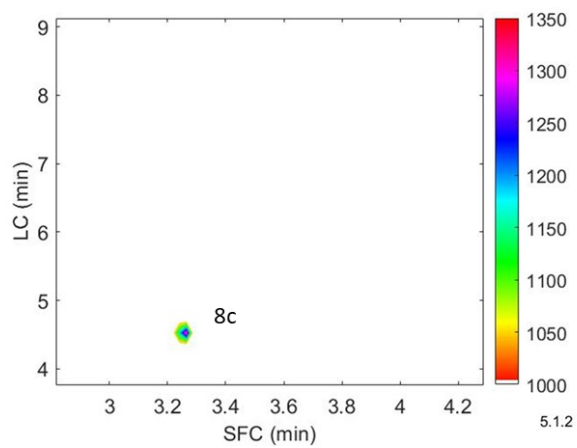

**Fig. S10** Extracted ion chromatogram for  $m/z$  367.3367 in *Padina pavonica* extract
